# Supplementary material for: ppGpp, the General Stress Response Alarmone, Is Required for the Expression of the α-Hemolysin Toxin in the Uropathogenic Escherichia coli Isolate, J96
Source: MDPI journal article supplement (doi:10.3390/ijms232012256), 2022-10-14
Supplement: s1 [file s1]

## Supplementary material

### Manuscript:

ppGpp, the general stress response alarmone, is required for the expression of the  $\alpha$ -hemolysin toxin in the uropathogenic *Escherichia coli* isolate, J96.

by Jorge Fernández-Vázquez, Juan David Cabrer-Panes, Anna Åberg, Antonio Juárez, Cristina Madrid, Tania Gaviria-Cantín, Llorenç Fernández-Coll, Andrés Felipe Vargas, Carlos Jonay Jiménez and Carlos Balsalobre

Table S1: Primers used in this study

Figure S1: Transcriptional expression of *hlyA* in strains AAG1 (Wt), JFV14 (*rfaH*), JFV23 (ppGpp<sup>0</sup>) and JFV15 (*rfaH*ppGpp<sup>0</sup>) carrying pMGP-1 by qPCR.

Table S1. Primers used in this work.

|                      | <b>Sequence</b>                                                  |
|----------------------|------------------------------------------------------------------|
| zurP1                | CCATGTGCTTCAATAACATTATGCCGCAGGGCAAAACCCATTGT<br>GTAGGCTGGAGCTTCG |
| zurP2                | GAAAAGACCACAACGCAGGAGTTATTAGCGCAGGCTGAAACATA<br>TGAATATCCTCCTTA  |
| HlyA up              | GATTTCCGGGATGTGGCC                                               |
| HlyA Taqman<br>probe | TCAGGCAGAAAGGT                                                   |
| HlyA down            | CCTTCAGCTTTATACATGATGAGGTC                                       |
| HlyD up              | ACATTCCATTAAGCTCGGGTATG                                          |
| HlyD Taqman<br>probe | CTGTCACTGCAGAAAT                                                 |
| HlyD down            | ACGCTTCGCATTCCAGTCTT                                             |

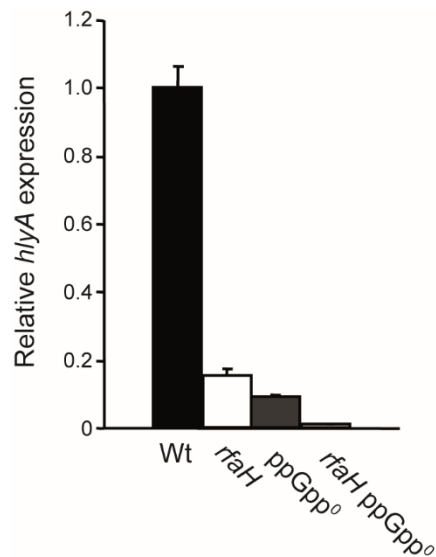

Figure S1: Transcriptional expression of *hlyA* in strains AAG1 (Wt), JFV14 (*rfaH*), JFV23 (*ppGpp*<sup>0</sup>) and JFV15 (*rfaHppGpp*<sup>0</sup>) carrying pMGP-1 by qPCR. RNA samples from cultures grown in LB at 37°C up to an OD<sub>600nm</sub> of 0.8. The results are the arithmetic mean and the standard deviation from three biological repeats.
